# Supplementary material
Source: PubMed Central journal article supplement (PMC3911843)
Supplement: IAI.00800-13_zii999090460so1.pdf [file IAI.00800-13_zii999090460so1.pdf]

**Table S1.** Primers used in this study

| Primer             | Sequence (5'- 3') <sup>a</sup>                                                      |
|--------------------|-------------------------------------------------------------------------------------|
| <u>Mutagenesis</u> |                                                                                     |
| <i>kpsC</i> F      | CGCCCTGAGGGCACAGGAACTGGCTGAAAACGCATGATTGTGT<br><u>AGGCTGGAGCTG</u>                  |
| <i>kpsC</i> R      | TCTGTGTAATAGTCAACTATGAAATTGTTTAGCCAAATCTGACC<br><u>TTGCGCCATGGTCCATATGAATATCC</u>   |
| <i>rcsB</i> F      | TAGAAAAATACATCAGCGACATTGACAGTTATGTCAAGAGCTT<br><u>GCTGTAGATTGTGTAGGCTGGAGCTGC</u>   |
| <i>rcsB</i> R      | AAATGCCAGATAAGACACTGACGCGTCTTATCTGGCCTACAGG<br><u>TGATTAGGTCCATATGAATATCCTCC</u>    |
| <i>rpoE</i> F      | CTTGCTCAAATTGCAGCTAATGGAGTGGCGTTTCGATAGCGCGT<br><u>GATTGTGTAGGCTGGAGCTG</u>         |
| <i>rpoE</i> R      | TTGTTCTTTCTGCATGCCTAATACCCTTATCCAGTATCCCGCTAT<br><u>CGTCAGGTCCATATGAATATCCTCC</u>   |
| <i>cpxR</i> F      | TTAGCGACGTCTGATGACGTAATTTCTGCCTCGGAGGTATTTAA<br><u>ACAATGATTGTGTAGGCTGGAGCTGC</u>   |
| <i>cpxR</i> R      | CAGCGTCAGCCAGAAGATGGCGAAGATGCGCGCGGTTAAGCTG<br><u>CCTATCAGGTCCATATGAATATCCTCC</u>   |
| <i>wca</i> F       | AGCCGCGCCGCCTACAGTGGACAACAGATGCTGGAGGAGTATG<br><u>ATTGTGTAGGCTGGAGCTG</u>           |
| <i>wca</i> R       | CGGCACCGAGAATCCACTTAAATCCTGCATCGTTTTCCCTTATA<br><u>TTCAGCGCCATGGTCCATATGAATATCC</u> |
| <i>yjbE</i> F      | AATGTTTTGGGTAAATCTCCATTCATTCAATGAAGGGAAATTGT<br><u>TATGATTGTGTAGGCTGGAGCTGC</u>     |
| <i>yjbE</i> R      | CTTGTCGCCTTCCTGCAACTCGAATTATTTGGGGATACATACT<br><u>TTATTAGGTCCATATGAATATCCTCC</u>    |
| <i>ydhA</i> F      | GGCGTATTGCCCTCCAGACCAGGAAAGTCTTCGGGATATGATT<br><u>GTGTAGGCTGGAGCTG</u>              |
| <i>ydhA</i> R      | ATTGTCAGTGGGTGACGCTATTGTGCGCCGCCCTGGAAAAAT<br><u>CTCATTAGGTCCATATGAATATCCTCC</u>    |
| <i>rcsA</i> F      | TATTCAGGTAAGGGGAATTATCGTTACGCATTGAGTGAGGGTA<br><u>TGCCATGATTGTGTAGGCTGGAGCTG</u>    |
| <i>rcsA</i> R      | CCTGACTGGTGGGAAACCACCAGTCAGAATGTGTTAGCGCGGT<br><u>CCATATGAATATCCTCC</u>             |

*resC F* TACCTTAACCACACTCCATCGGTCACCTGAGGCGGAGCTTCGCC  
CCTTTGATTGTGTAGGCTGGAGCTG

*resC R* TGGCATTTCACCGGATTGCCGGATGCGGCGTAAACGCCTTATC  
CGTCCTAGGTCCATATGAATATCCTCC

### Cloning

FpTRC*wca* GAACCATGGATATTCTGCAATTTAATG

RpTRC*wca* CGCTCTAGATATTCAGCTTTTGTATATAAG

### qRT-PCR

qRT-rpIT F TTGCCTTCCAGGCTGTTATC

qRT-rpIT R CTGCTTTCGCTTTTTCAACC

qRT-osmB F AAATGACCGCGGCTGTTC

qRT-osmB R CCGACCTGGTGACCAATAAC

qRT-bdm F CAGGCAGAAAATTCAACAGC

qRT-bdm R TAAAGCGTAGGGTGCTGACC

qRT-ydhA F GTAGCGCGTTCAATCAACTG

qRT-ydhA R GCCTTTCGACCAGAAAACATAG

qRT-rpoE F AAAGTGGCGAGTCTGGTTTC

qRT-rpoE R ATCACTGGAAGGTGGACGAC

qRT-ivy F CGTATACTCCCGCACAAACC

qRT-ivy R CATCAATAGAAAGCGCATCG

qRT-ugd F TGGCGAACTACCAGTCTGTG

qRT-ugd R CTTTCGCCTTGATACGCTTC

qRT-cpxR F TCTCCCGAAACCGTTTAATG

qRT-cpxR R TGTGCCAGCAAATAGAGCAG

qRT-rcsB F GTACATCAAGCGCCATTTCC

qRT-rcsB R TTTTCCAACAGGCGAGAAAC

qRT-wcaD F ATGGCTGTATTCCTGGTTGG

qRT-wcaD R TCCGCACCGTTAAATATTC

---

<sup>a</sup> Restriction sites are shown in bold and pKD4 sequences are underlined.
