# Supplementary material
Source: PubMed Central journal article supplement (PMC3911843)
Supplement: IAI.00800-13_zii999090460so2.pdf [file IAI.00800-13_zii999090460so2.pdf]

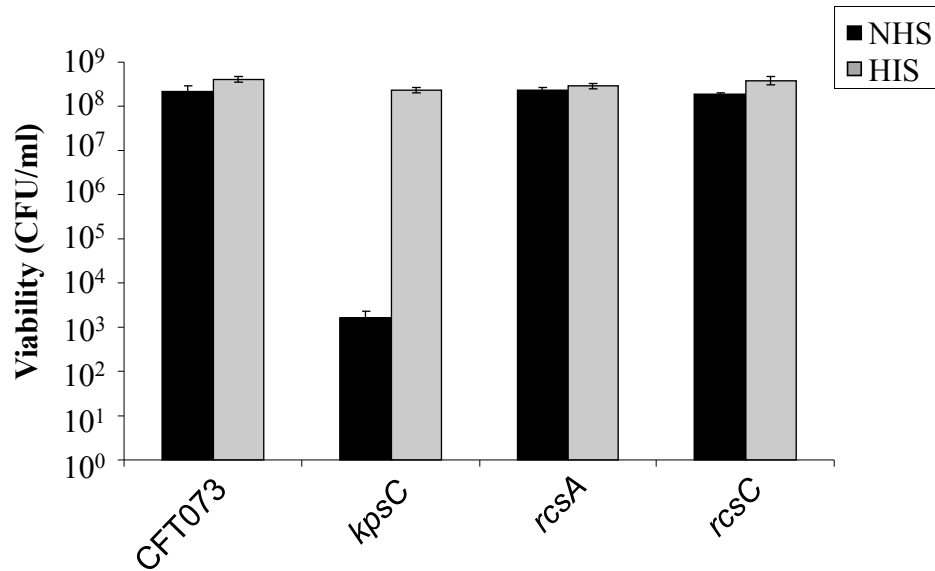

**Figure S1. Serum survival of CFT073 and *rcs* mutants.** CFT073 and mutants (CFT073  $\Delta kpsC$ , CFT073  $\Delta rcsA$  and CFT073  $\Delta rcsC$ ) were adjusted to the same concentration in LB and incubated with 50 % NHS or HIS at 37 °C for 45 min. Bacteria were enumerated by the method of Miles and Misra after incubation with sera.
